# Supplementary material for: The importance of nutrition in broiler breeder fertility : feed science
Source: Springer Nature journal article supplement (doi:10.1038/s41596-022-00755-x), 2013-07-01
Supplement: MOESM3 [file 41596_2022_755_MOESM3_ESM16.xlsx]

## Sheet: Source Data Suppl Fig 3
Cell viability (%)
Negative control					MC3 LNP					4A3-SC8 mDLNP					RNAiMAX
89.414	92.4123	98.0958	95.0701	98.56	103.508	90.4902	96.7583	97.9342	94.8569	105.674	99.6947	92.8764	103.711	102.418	104.656	104.739	102.043	91.5321	92.1303
Luminescence (RLU)
Cells					Negative control					MC3 LNP					4A3-SC8 mDLNP					RNAiMAX
976	986	656	716	976	1016	636	916	946	846	2067425	1720506	1921760	1782474	2378635	2671348	2310156	2911136	2333993	2697778	655035	601195	622373	604696	581244
